# Supplementary material for: Highly stable and water dispersible polymer-coated CsPbBr3 nanocrystals for Cu-ion detection in water
Source: Royal Society of Chemistry journal article supplement (doi:10.1039/d2ma00719c), 2022-01-01
Supplement: d2ma00719c1.pdf [file d2ma00719c1.pdf]

## Supporting information

### **Highly stable and water dispersible polymer-coated CsPbBr<sub>3</sub> nanocrystals for Cu-ion detection in water**

*Manav Raj Kar, Urjjarani Patel, Saikat Bhaumik\**

#### **Experimental section:**

**Characterization methods:** UV-visible absorption spectra of NCs were recorded with a Shimadzu UV-2700 Spectrophotometer. Steady-state photoluminescence (PL) spectra were collected with Ocean Insight MAYA 2000 Pro high sensitivity Spectrometer using a 370 nm UV excitation source. X-Ray diffraction (XRD) analysis was carried out with the Bruker D8 diffractometer using Cu-K<sub>α</sub> ( $\lambda=1.54 \text{ \AA}$ ) as incident radiation. Transmission electron microscopy (TEM) and high-resolution transmission electron microscopy (HRTEM) imaging were recorded by Jeol-JEM-2010 microscope operated at 200 kV to determine the shape and size of the NCs. The Fourier Transform Infrared (FTIR) analysis was carried out using JASCO FT/IR-6600 Infrared Spectrometer to confirm the silica and polymers encapsulation around the NCs.

**Ion detection test:** To probe the Cu<sup>2+</sup> ions, the PL intensity of the samples was recorded after the subsequent addition of different metal ions. Firstly, aqueous solutions containing metal ions at same concentration (0.1 mM) including Ni<sup>2+</sup>, Al<sup>3+</sup>, In<sup>3+</sup>, Co<sup>2+</sup>, Fe<sup>2+</sup>, Fe<sup>3+</sup>, Zn<sup>2+</sup> and Cu<sup>2+</sup> were prepared. The NC aqueous solution was prepared by dispersing directly dispersing powder PbN-4 sample in DI water (concentration~ 5 mg/mL). Next, 100  $\mu\text{L}$  of PbN-4 NC aqueous solution was taken in 7 glass vials and 100  $\mu\text{L}$  of each of the aqueous solutions containing the metal ions were added and the PL intensity of the NC solution was observed.

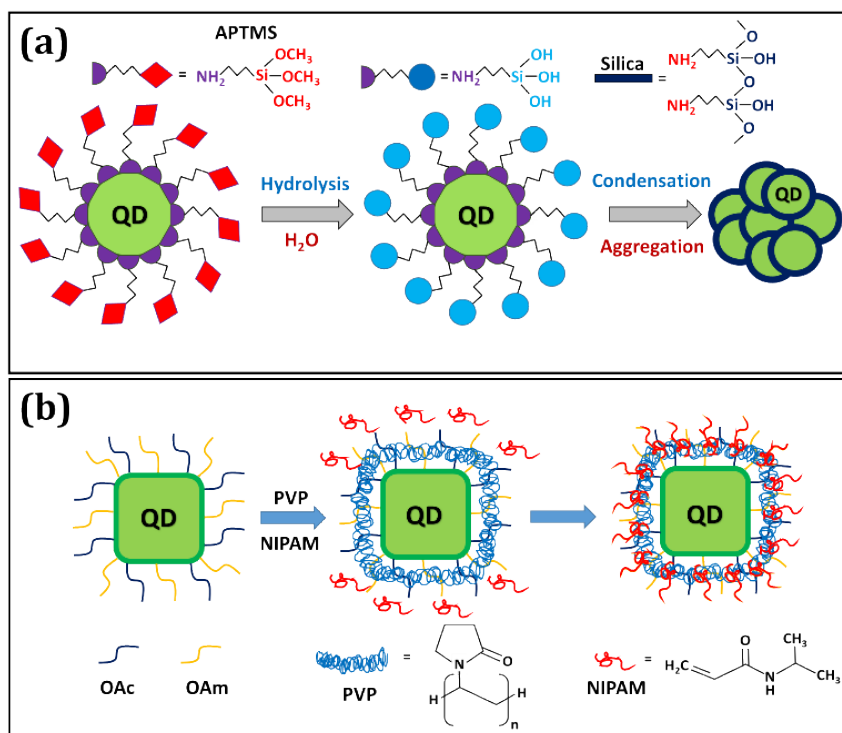

**Figure S1.** (a) Schematic representation of hydrolysis and condensation processes of APTMS for silica shelling around the perovskite NCs, and (b) Schematic representation of polymer coating around PbN NCs.

## Results and discussion:

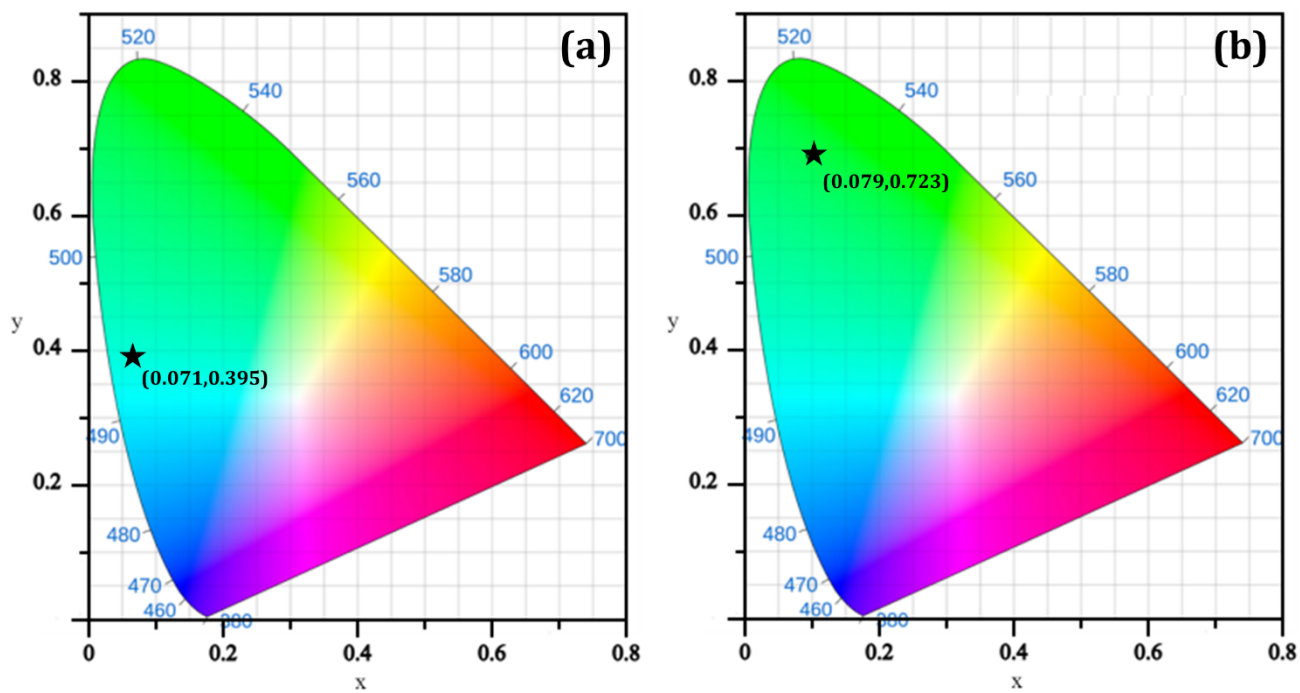

**Figure S3.** CIE color coordinates of (a) CPB@SiO<sub>2</sub> and (b) PbN-3 NCs.

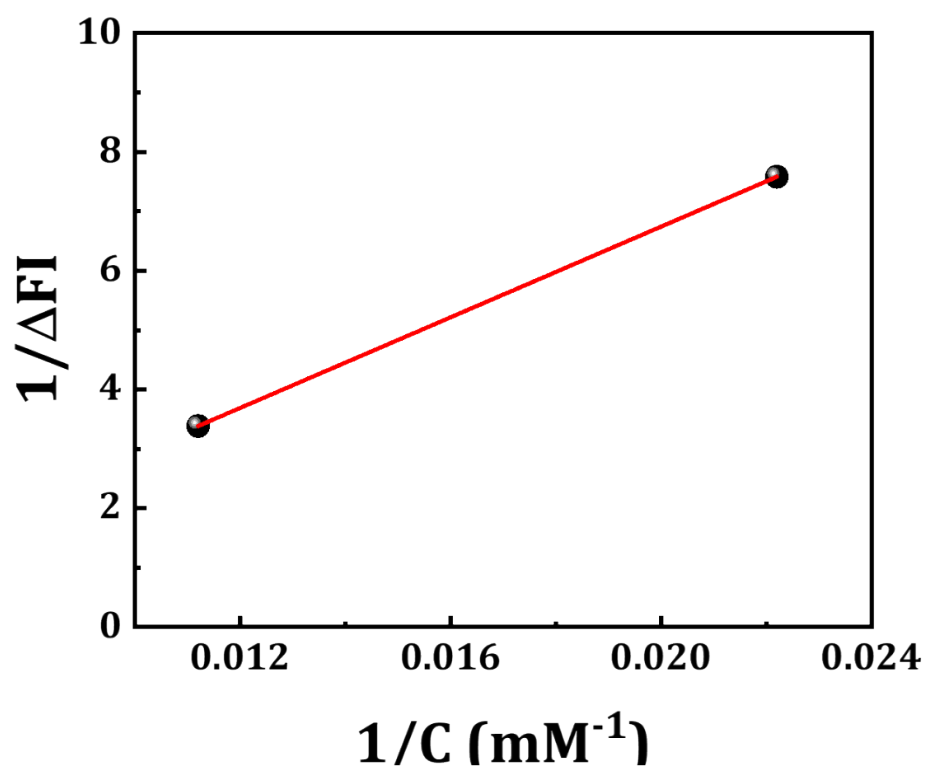

**Figure S4.** Double-reciprocal plot of  $[C]$  of NIPAM versus the change in the fluorescence intensity ( $\Delta FI$ ) of PbN NCs.

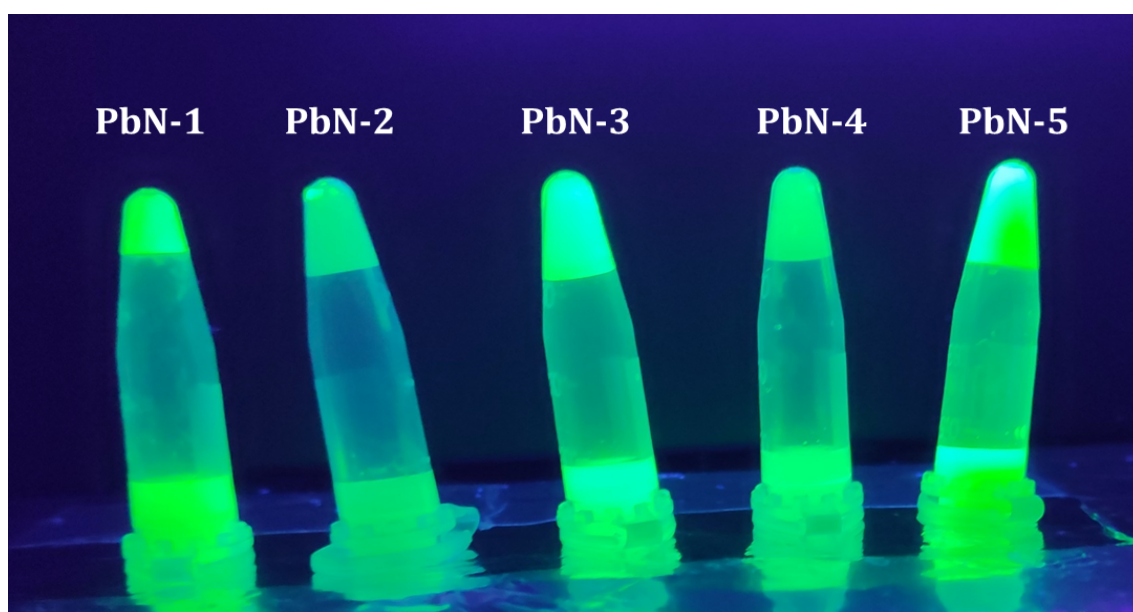

**Figure S5.** Photographic image of PbN NCs dispersed in water under a UV lamp.

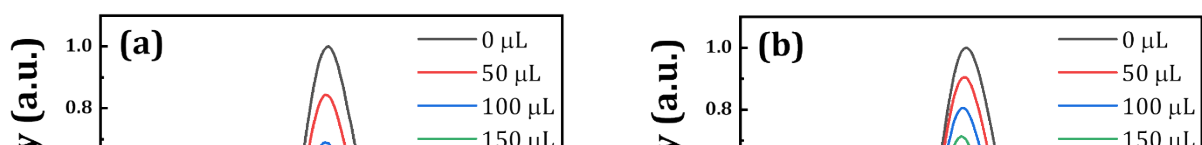

|                      | 0<br>μL | 50<br>μL | 100<br>μL | 150<br>μL | 200<br>μL | 250<br>μL | 300<br>μL | 350<br>μL | 400<br>μL | 450<br>μL | 500<br>μL | 550<br>μL | 600<br>μL | 650<br>μL | 700<br>μL | 750<br>μL | 800<br>μL |
|----------------------|---------|----------|-----------|-----------|-----------|-----------|-----------|-----------|-----------|-----------|-----------|-----------|-----------|-----------|-----------|-----------|-----------|
| CPB@SiO <sub>2</sub> |         |          |           |           |           |           |           |           |           |           |           |           |           |           |           |           |           |
| PbN-1                |         |          |           |           |           |           |           |           |           |           |           |           |           |           |           |           |           |
| PbN-2                |         |          |           |           |           |           |           |           |           |           |           |           |           |           |           |           |           |
| PbN-3                |         |          |           |           |           |           |           |           |           |           |           |           |           |           |           |           |           |
| PbN-4                |         |          |           |           |           |           |           |           |           |           |           |           |           |           |           |           |           |



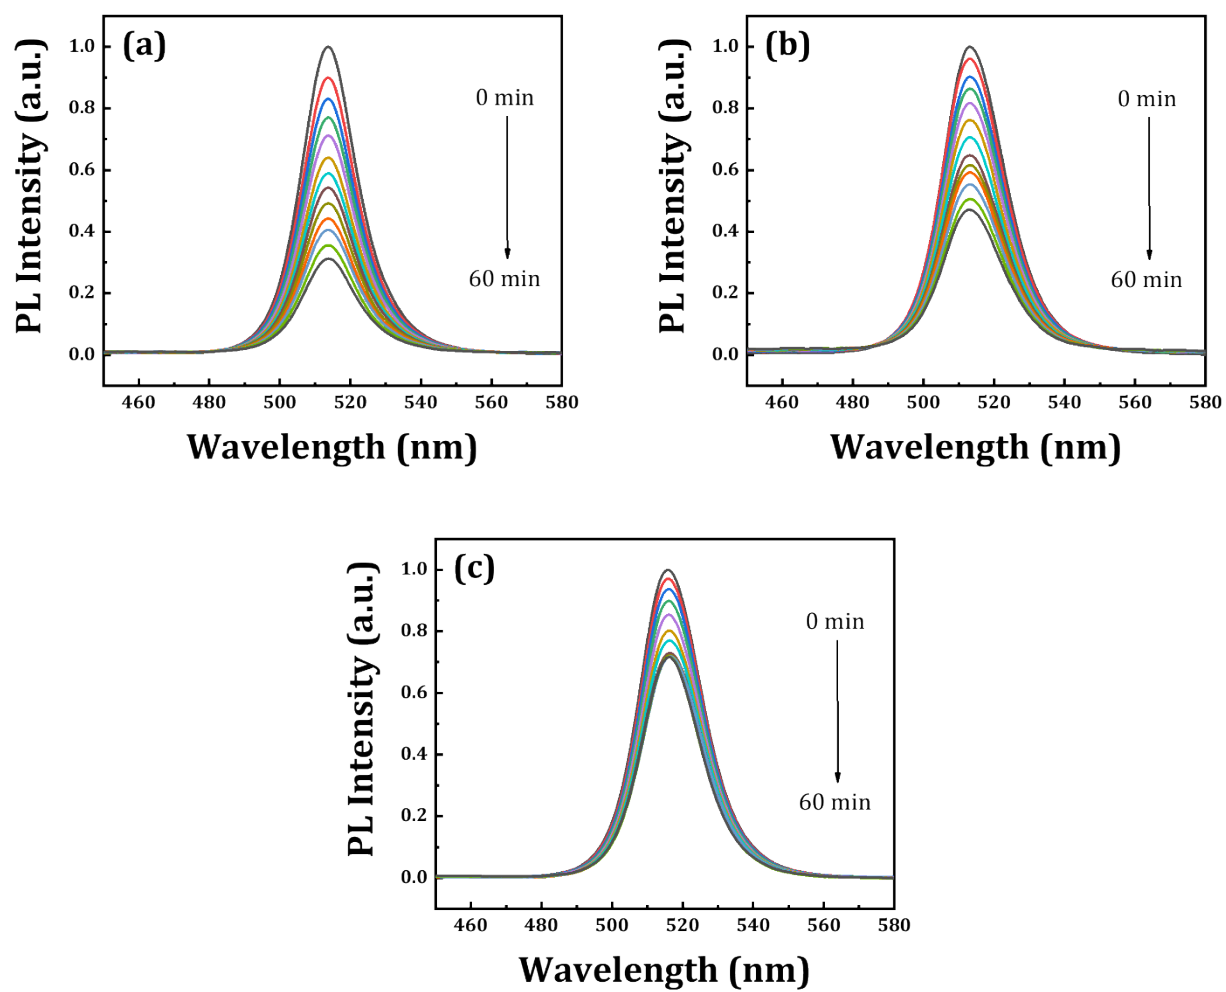

**Figure S8.** Water stability of (a) PbN-2, (b) PbN-3 and (c) PbN-5 as a function of time.

|                      | 0 min                                                                               | 15 min                                                                              | 30 min                                                                              | 45 min                                                                                | 60 min                                                                                |
|----------------------|-------------------------------------------------------------------------------------|-------------------------------------------------------------------------------------|-------------------------------------------------------------------------------------|---------------------------------------------------------------------------------------|---------------------------------------------------------------------------------------|
| CPB@SiO <sub>2</sub> |    |    |    |    |    |
| PbN-1                |    |    |    |    |    |
| PbN-2                |    |    |    |    |    |
| PbN-3                |   |   |   |   |   |
| PbN-4                |  |  |  |  |  |
| PbN-5                |  |  |  |  |  |

**Figure S9.** Water stability test 2: Photographs of samples at a time interval of 15 mins after addition of DI water under a UV Lamp.



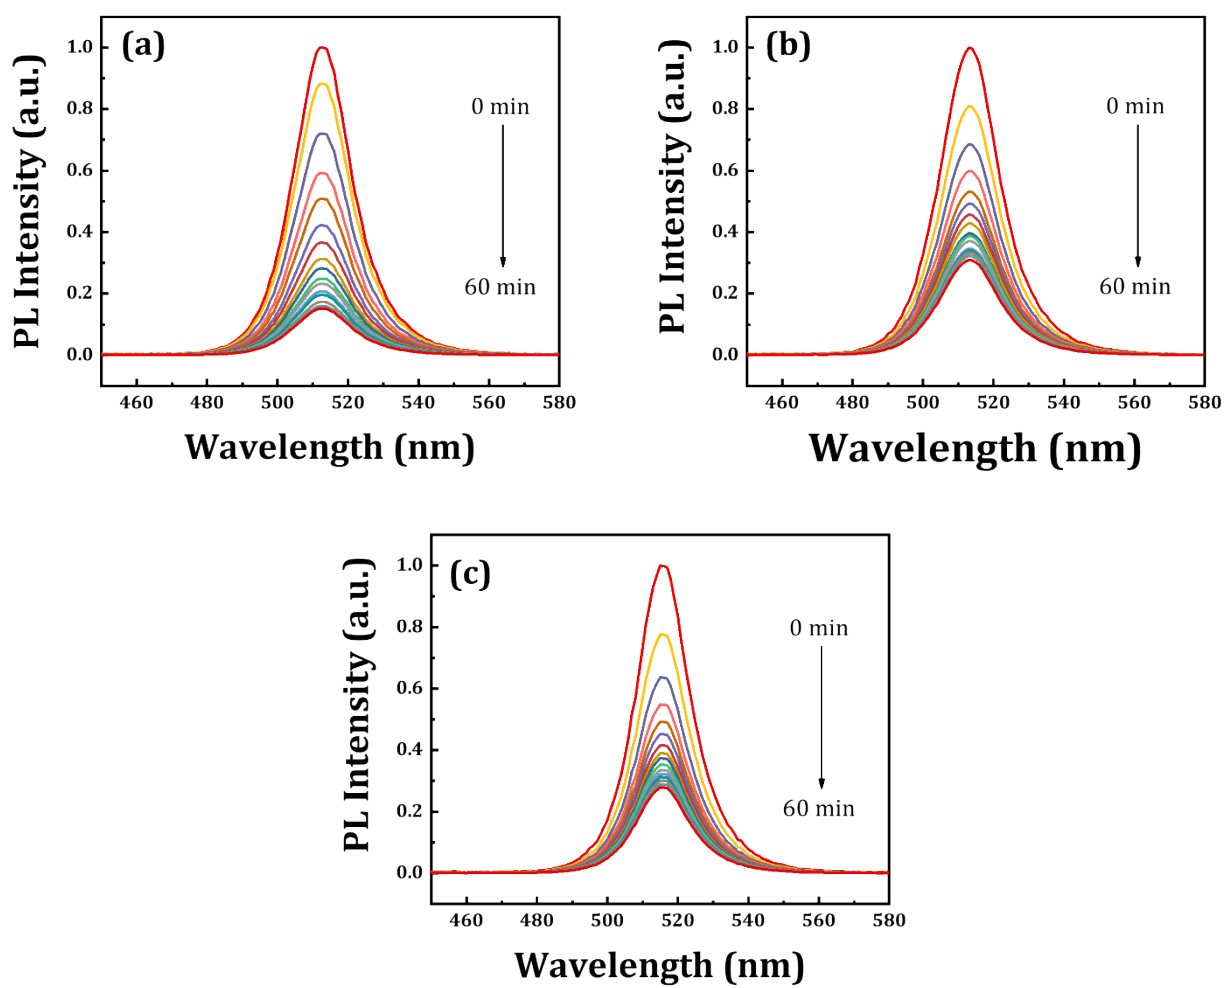

**Figure S10.** Heat stability of (a) PbN-2, (b) PbN-3 and (c) PbN-5 at 60°C as a function of time.

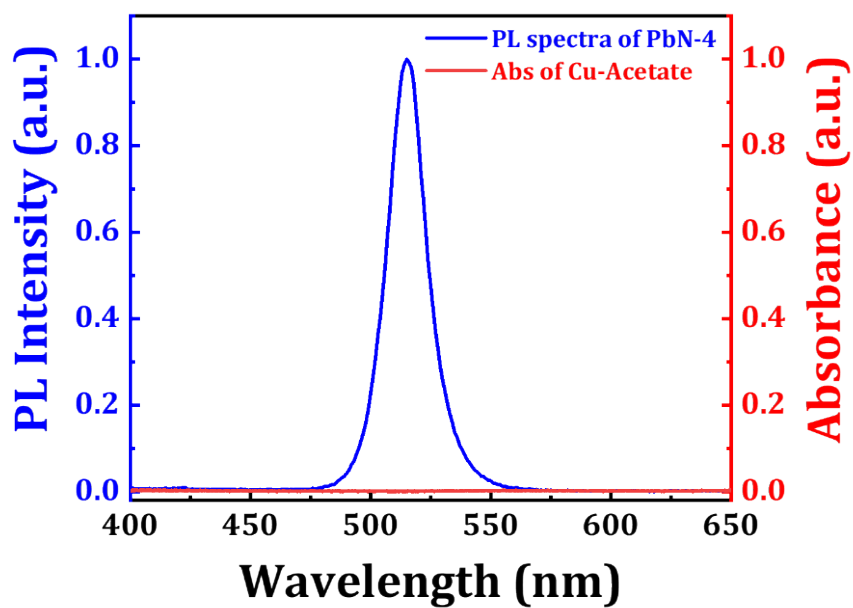

**Figure S11.** Absorption and PL spectra of Cu-acetate and PbN-4 NCs as shown in legends.

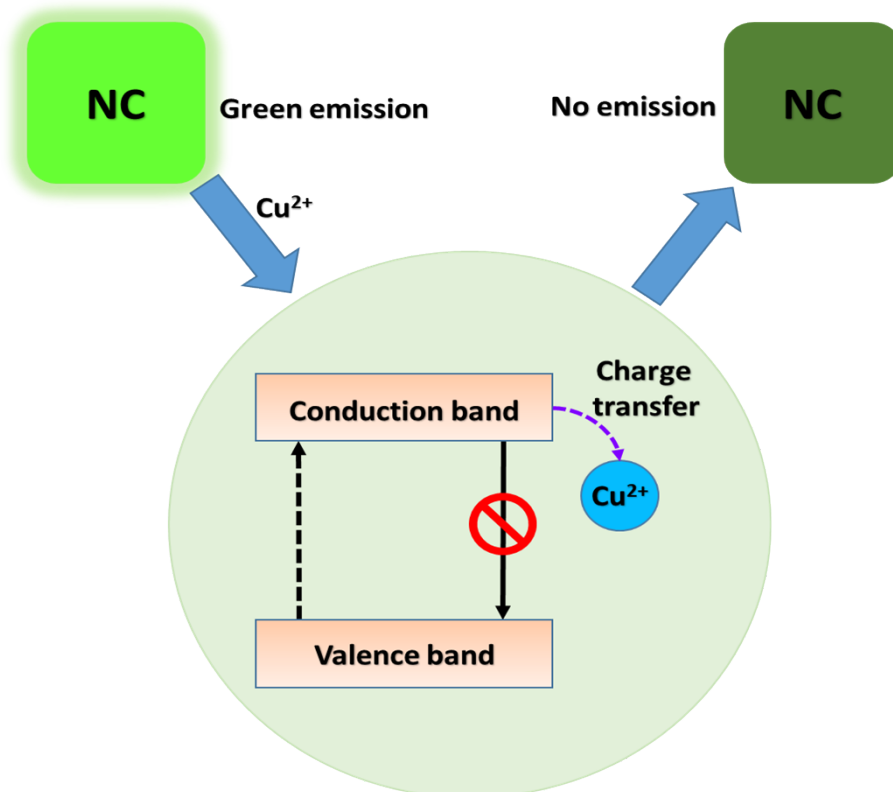

**Figure S12.** Schematic representation of charge transfer mechanism in NCs in presence of  $\text{Cu}^{2+}$ -ions.
